# Supplementary material
Source: publisher figshare collection journal article supplement (https://plos.figshare.com/articles/dataset/_/6196535)
Supplement: Supplementary file 1 [file 1]

Archive with 5 entries (5 files):
- pntd.0006458.s001.pdf
- pntd.0006458.s002.pdf
- pntd.0006458.s003.pdf
- pntd.0006458.s004.docx
- pntd.0006458.s005.docx
